# Supplementary material
Source: publisher figshare collection journal article supplement (https://aacr.figshare.com/articles/dataset/_/23627179)
Supplement: Supplementary file 1 [file 41457898]

**Supplementary Table S4. Subgroup analysis of prediagnostic circulating sex hormones levels and risk of esophageal cancer**

| <b>Study characteristics</b>        | <b>Number of studies</b> | <b>Pooled OR (95% CI)</b> | <b><i>P</i><sub>Heterogeneity</sub><sup>a</sup></b> | <b><i>I</i><sup>2</sup> (%)</b> | <b><i>P</i><sub>Difference</sub><sup>b</sup></b> |
|-------------------------------------|--------------------------|---------------------------|-----------------------------------------------------|---------------------------------|--------------------------------------------------|
| <b>Testosterone</b>                 |                          |                           |                                                     |                                 |                                                  |
| Study design                        |                          |                           |                                                     |                                 |                                                  |
| Cohort study                        | 3                        | 1.06 (0.89-1.27)          | 0.291                                               | 17.6                            | 0.076                                            |
| Nested case-control study           | 2                        | <b>0.60 (0.36-0.99)</b>   | 0.924                                               | 0.0                             |                                                  |
| Sex                                 |                          |                           |                                                     |                                 |                                                  |
| Male                                | 5                        | 1.01 (0.77-1.32)          | 0.076                                               | 50.0                            | 0.921                                            |
| Female                              | 3                        | 0.91 (0.66-1.25)          | 0.465                                               | 0.0                             |                                                  |
| Postmenopausal women (only)         | 2                        | 0.92 (0.63-1.33)          | 0.279                                               | 21.6                            |                                                  |
| Histology                           |                          |                           |                                                     |                                 |                                                  |
| Adenocarcinoma                      | 3                        | 0.86 (0.62-1.20)          | 0.221                                               | 31.9                            | 0.628                                            |
| Squamous cell carcinoma             | 1                        | 1.14 (0.43-3.08)          | 0.046                                               | 74.9                            |                                                  |
| Mixed                               | 2                        | 1.12 (0.92-1.36)          | 0.519                                               | 0.0                             |                                                  |
| Follow-up time (years)              |                          |                           |                                                     |                                 |                                                  |
| Mean/median<10                      | 3                        | 1.01 (0.81-1.28)          | 0.107                                               | 42.6                            | 0.543                                            |
| Mean/median≥10                      | 2                        | 0.85 (0.55-1.31)          | 0.370                                               | 0.0                             |                                                  |
| <b>Free testosterone</b>            |                          |                           |                                                     |                                 |                                                  |
| Study design                        |                          |                           |                                                     |                                 |                                                  |
| Cohort study                        | 2                        | 0.93 (0.71-1.21)          | 0.128                                               | 41.6                            | 0.632                                            |
| Nested case-control study           | 1                        | 0.74 (0.37-1.48)          | -                                                   | -                               |                                                  |
| Sex                                 |                          |                           |                                                     |                                 |                                                  |
| Male                                | 3                        | 0.99 (0.79-1.25)          | 0.296                                               | 18.9                            | 0.364                                            |
| Postmenopausal women                | 2                        | 0.74 (0.42-1.31)          | 0.153                                               | 46.8                            |                                                  |
| Histology                           |                          |                           |                                                     |                                 |                                                  |
| Adenocarcinoma                      | 2                        | 0.85 (0.65-1.12)          | 0.558                                               | 0.0                             | 0.887                                            |
| Squamous cell carcinoma             | 1                        | 0.72 (0.22-2.36)          | 0.041                                               | 76.2                            |                                                  |
| Mixed                               | 1                        | 0.98 (0.64-1.50)          | 0.134                                               | 55.4                            |                                                  |
| <b>Estradiol</b>                    |                          |                           |                                                     |                                 |                                                  |
| Study design                        |                          |                           |                                                     |                                 |                                                  |
| Cohort study                        | 1                        | 1.23 (0.81-1.87)          | 0.954                                               | 0.0                             | 0.985                                            |
| Nested case-control study           | 2                        | 1.24 (0.81-1.90)          | 0.738                                               | 0.0                             |                                                  |
| Sex                                 |                          |                           |                                                     |                                 |                                                  |
| Male                                | 3                        | 1.24 (0.92-1.68)          | 0.985                                               | 0.0                             | 0.835                                            |
| Postmenopausal women                | 1                        | 0.92 (0.07-12.09)         | -                                                   | -                               |                                                  |
| Histology                           |                          |                           |                                                     |                                 |                                                  |
| Adenocarcinoma                      | 3                        | 1.23 (0.90-1.67)          | 0.983                                               | 0.0                             | 0.850                                            |
| Squamous cell carcinoma             | 1                        | 1.38 (0.47-4.05)          | -                                                   | -                               |                                                  |
| Follow-up time (years)              |                          |                           |                                                     |                                 |                                                  |
| Mean/median<10                      | 2                        | 1.21 (0.85-1.71)          | 0.988                                               | 0.0                             | 0.798                                            |
| Mean/median≥10                      | 1                        | 1.33 (0.74-2.39)          | -                                                   | -                               |                                                  |
| <b>Sex hormone-binding globulin</b> |                          |                           |                                                     |                                 |                                                  |

|                               |   |                  |       |     |       |
|-------------------------------|---|------------------|-------|-----|-------|
| <b>Study design</b>           |   |                  |       |     |       |
| Cohort study                  | 2 | 1.16 (0.99-1.35) | 0.955 | 0.0 | 0.286 |
| Nested case-control study     | 2 | 0.86 (0.54-1.37) | 0.809 | 0.0 |       |
| <b>Sex</b>                    |   |                  |       |     |       |
| Male                          | 4 | 1.10 (0.94-1.29) | 0.863 | 0.0 | 0.602 |
| Postmenopausal women          | 2 | 1.23 (0.86-1.76) | 0.629 | 0.0 |       |
| <b>Histology</b>              |   |                  |       |     |       |
| Adenocarcinoma                | 3 | 1.05 (0.82-1.34) | 0.794 | 0.0 | 0.633 |
| Squamous cell carcinoma       | 1 | 1.45 (0.80-2.63) | 0.486 | 0.0 |       |
| Mixed                         | 1 | 1.14 (0.94-1.38) | 0.972 | 0.0 |       |
| <b>Follow-up time (years)</b> |   |                  |       |     |       |
| Mean/median<10                | 3 | 1.14 (0.98-1.33) | 0.960 | 0.0 | 0.348 |
| Mean/median≥10                | 1 | 0.82 (0.44-1.53) | -     | -   |       |

**Note:** Expressed as pooled OR and 95% CI comparing the highest with the lowest tertiles of sex hormone levels.

**Abbreviations:** OR, odds ratio; CI, confidence interval.

<sup>a</sup> *P* value in Cochran's *Q* test.

<sup>b</sup> *P* value in the test of subgroup difference.

**Supplementary Table S5. Subgroup analysis of prediagnostic circulating sex hormones levels and risk of gastric cancer**

| <b>Study characteristics</b> | <b>Number of studies</b> | <b>Pooled OR (95% CI)</b> | <b><i>P</i><sub>Heterogeneity</sub><sup>a</sup></b> | <b><i>I</i><sup>2</sup> (%)</b> | <b><i>P</i><sub>Difference</sub><sup>b</sup></b> |
|------------------------------|--------------------------|---------------------------|-----------------------------------------------------|---------------------------------|--------------------------------------------------|
| <b>Testosterone</b>          |                          |                           |                                                     |                                 |                                                  |
| Study design                 |                          |                           |                                                     |                                 |                                                  |
| Cohort study                 | 2                        | 1.19 (0.93-1.53)          | 0.993                                               | 0.0                             | 0.105                                            |
| Nested case-control study    | 2                        | 0.74 (0.51-1.07)          | 0.494                                               | 0.0                             |                                                  |
| Sex                          |                          |                           |                                                     |                                 |                                                  |
| Male                         | 4                        | 0.99 (0.73-1.34)          | 0.187                                               | 37.5                            | 0.937                                            |
| Female                       | 2                        | 1.12 (0.66-1.91)          | 0.990                                               | 0.0                             |                                                  |
| Postmenopausal women (only)  | 1                        | 1.12 (0.62-2.02)          | -                                                   | -                               |                                                  |
| Geographic area              |                          |                           |                                                     |                                 |                                                  |
| Asia                         | 1                        | 0.67 (0.42-1.07)          | -                                                   | -                               | 0.115                                            |
| Non-Asia                     | 3                        | 1.14 (0.91-1.44)          | 0.928                                               | 0.0                             |                                                  |
| Anatomical subsite*          |                          |                           |                                                     |                                 |                                                  |
| Cardia                       | 2                        | 1.05 (0.74-1.51)          | 0.633                                               | 0.0                             | 0.286                                            |
| Non-cardia                   | 2                        | 0.82 (0.58-1.15)          | 0.421                                               | 0.0                             |                                                  |
| Mixed                        | 2                        | 1.19 (0.93-1.53)          | 0.993                                               | 0.0                             |                                                  |
| Follow-up time (years)       |                          |                           |                                                     |                                 |                                                  |
| Mean/median<10               | 2                        | 1.12 (0.87-1.45)          | 0.689                                               | 0.0                             | 0.333                                            |
| Mean/median≥10               | 2                        | 0.91 (0.57-1.43)          | 0.240                                               | 29.9                            |                                                  |
| <b>Free testosterone</b>     |                          |                           |                                                     |                                 |                                                  |
| Study design                 |                          |                           |                                                     |                                 |                                                  |
| Cohort study                 | 1                        | 0.95 (0.70-1.29)          | 0.603                                               | 0.0                             | 0.677                                            |
| Nested case-control study    | 1                        | 0.79 (0.44-1.42)          | -                                                   | -                               |                                                  |
| Sex                          |                          |                           |                                                     |                                 |                                                  |
| Male                         | 2                        | 0.88 (0.65-1.19)          | 0.685                                               | 0.0                             | 0.636                                            |
| Postmenopausal women         | 1                        | 1.10 (0.59-2.05)          | -                                                   | -                               |                                                  |
| Anatomical subsite*          |                          |                           |                                                     |                                 |                                                  |
| Cardia                       | 2                        | 0.82 (0.57-1.19)          | 0.608                                               | 0.0                             | 0.708                                            |
| Non-cardia                   | 1                        | 0.73 (0.40-1.33)          | 0.965                                               | 0.0                             |                                                  |
| Mixed                        | 1                        | 0.95 (0.70-1.29)          | 0.603                                               | 0.0                             |                                                  |
| <b>Estradiol</b>             |                          |                           |                                                     |                                 |                                                  |
| Study design                 |                          |                           |                                                     |                                 |                                                  |
| Cohort study                 | 1                        | 1.09 (0.62-1.92)          | -                                                   | -                               | 0.815                                            |
| Nested case-control study    | 2                        | 0.88 (0.40-1.96)          | 0.025                                               | 80.2                            |                                                  |
| Geographic area              |                          |                           |                                                     |                                 |                                                  |
| Asia                         | 1                        | 1.29 (0.85-1.96)          | -                                                   | -                               | 0.522                                            |
| Non-Asia                     | 2                        | 0.79 (0.42-1.49)          | 0.115                                               | 59.6                            |                                                  |
| Anatomical subsite*          |                          |                           |                                                     |                                 |                                                  |
| Cardia                       | 2                        | 0.86 (0.36-2.08)          | 0.063                                               | 71.0                            | 0.874                                            |
| Non-cardia                   | 2                        | 1.22 (0.82-1.81)          | 0.412                                               | 0.0                             |                                                  |
| Mixed                        | 1                        | 1.09 (0.62-1.92)          | -                                                   | -                               |                                                  |

|                                     |   |                         |       |      |       |
|-------------------------------------|---|-------------------------|-------|------|-------|
| Follow-up time (years)              |   |                         |       |      |       |
| Mean/median<10                      | 2 | 0.79 (0.42-1.49)        | 0.115 | 59.6 | 0.522 |
| Mean/median≥10                      | 1 | 1.29 (0.85-1.96)        | -     | -    |       |
| <b>Sex hormone-binding globulin</b> |   |                         |       |      |       |
| Study design                        |   |                         |       |      |       |
| Cohort study                        | 1 | 1.26 (0.93-1.71)        | 0.365 | 0.0  | 0.534 |
| Nested case-control study           | 2 | <b>1.52 (1.03-2.25)</b> | 0.517 | 0.0  |       |
| Sex                                 |   |                         |       |      |       |
| Male                                | 3 | <b>1.43 (1.10-1.85)</b> | 0.742 | 0.0  | 0.388 |
| Postmenopausal women                | 1 | 0.97 (0.51-1.84)        | -     | -    |       |
| Geographic area                     |   |                         |       |      |       |
| Asia                                | 1 | <b>1.71 (1.01-2.90)</b> | -     | -    | 0.431 |
| Non-Asia                            | 2 | 1.27 (0.97-1.67)        | 0.657 | 0.0  |       |
| Anatomical subsite*                 |   |                         |       |      |       |
| Cardia                              | 2 | 1.37 (0.94-1.99)        | 0.982 | 0.0  | 0.630 |
| Non-cardia                          | 2 | <b>1.62 (1.06-2.49)</b> | 0.331 | 9.6  |       |
| Mixed                               | 1 | 1.26 (0.93-1.71)        | 0.365 | 0.0  |       |
| Follow-up time (years)              |   |                         |       |      |       |
| Mean/median<10                      | 2 | 1.27 (0.97-1.67)        | 0.657 | 0.0  | 0.431 |
| Mean/median≥10                      | 1 | <b>1.71 (1.01-2.90)</b> | -     | -    |       |

**Note:** Expressed as pooled OR and 95% CI comparing the highest with the lowest tertiles of sex hormone levels.

**Abbreviations:** OR, odds ratio; CI, confidence interval.

<sup>a</sup> *P* value in Cochran's *Q* test.

<sup>b</sup> *P* value in the test of subgroup difference.

\* The data for cardia, non-cardia and mixed of McMenamin 2021 were included simultaneously in the subgroup analysis of anatomical subsite.

**Supplementary Table S6. Subgroup analysis of prediagnostic circulating sex hormones levels and risk of liver cancer**

| <b>Study characteristics</b>       | <b>Number of studies</b> | <b>Pooled OR (95% CI)</b> | <b><i>P</i><sub>Heterogeneity</sub><sup>a</sup></b> | <b><i>I</i><sup>2</sup> (%)</b> | <b><i>P</i><sub>Difference</sub><sup>b</sup></b> |
|------------------------------------|--------------------------|---------------------------|-----------------------------------------------------|---------------------------------|--------------------------------------------------|
| <b>Testosterone</b>                |                          |                           |                                                     |                                 |                                                  |
| Study design                       |                          |                           |                                                     |                                 |                                                  |
| Cohort study                       | 4                        | <b>1.96 (1.57-2.44)</b>   | 0.357                                               | 9.2                             | 0.792                                            |
| Nested case-control study          | 5                        | <b>2.33 (1.04-5.21)</b>   | 0.000                                               | 83.6                            |                                                  |
| Sex                                |                          |                           |                                                     |                                 |                                                  |
| Male                               | 7                        | <b>2.63 (1.65-4.18)</b>   | 0.002                                               | 68.3                            | 0.516                                            |
| Female                             | 3                        | 1.46 (0.93-2.30)          | 0.104                                               | 55.8                            |                                                  |
| Postmenopausal women (only)        | 2                        | 1.27 (0.81-2.00)          | 0.131                                               | 56.1                            |                                                  |
| Mixed                              | 1                        | 1.22 (0.42-3.54)          | -                                                   | -                               |                                                  |
| Geographic area                    |                          |                           |                                                     |                                 |                                                  |
| Asia                               | 5                        | <b>3.27 (1.57-6.83)</b>   | 0.002                                               | 73.6                            | 0.113                                            |
| Non-Asia                           | 4                        | <b>1.62 (1.17-2.23)</b>   | 0.051                                               | 54.7                            |                                                  |
| HBsAg status                       |                          |                           |                                                     |                                 |                                                  |
| Negative                           | 1                        | 1.00 (0.40-2.50)          | -                                                   | -                               | 0.389                                            |
| Positive                           | 3                        | <b>3.90 (1.43-10.64)</b>  | 0.002                                               | 83.4                            |                                                  |
| Mixed                              | 4                        | 1.84 (0.77-4.40)          | 0.051                                               | 61.3                            |                                                  |
| Unspecified                        | 2                        | <b>1.93 (1.50-2.49)</b>   | 0.291                                               | 19.7                            |                                                  |
| Adjustment for HBsAg status        |                          |                           |                                                     |                                 |                                                  |
| Yes                                | 4                        | 1.84 (0.77-4.40)          | 0.051                                               | 61.3                            | 0.630                                            |
| No                                 | 5                        | <b>2.24 (1.54-3.26)</b>   | 0.002                                               | 69.6                            |                                                  |
| Adjustment for anti-HCV positivity |                          |                           |                                                     |                                 |                                                  |
| Yes                                | 4                        | 1.84 (0.77-4.40)          | 0.051                                               | 61.3                            | 0.630                                            |
| No                                 | 5                        | <b>2.24 (1.54-3.26)</b>   | 0.002                                               | 69.6                            |                                                  |
| Histology <sup>d</sup>             |                          |                           |                                                     |                                 |                                                  |
| Total liver cancer                 | 3                        | <b>1.65 (1.16-2.34)</b>   | 0.031                                               | 62.3                            | 0.122                                            |
| Hepatocellular carcinoma           | 7                        | <b>2.72 (1.52-4.87)</b>   | 0.003                                               | 67.0                            |                                                  |
| Intrahepatic cholangiocarcinoma    | 1                        | 0.56 (0.24-1.31)          | -                                                   | -                               |                                                  |
| Follow-up time (years)             |                          |                           |                                                     |                                 |                                                  |
| Mean/median<10                     | 6                        | <b>2.55 (1.60-4.08)</b>   | 0.001                                               | 72.1                            | 0.267                                            |
| Mean/median≥10                     | 3                        | 1.49 (0.99-2.25)          | 0.170                                               | 40.3                            |                                                  |
| <b>Free testosterone</b>           |                          |                           |                                                     |                                 |                                                  |
| Study design                       |                          |                           |                                                     |                                 |                                                  |
| Cohort study                       | 2                        | 0.92 (0.53-1.60)          | 0.161                                               | 45.3                            | 0.572                                            |
| Nested case-control study          | 2                        | 0.72 (0.46-1.14)          | 0.904                                               | 0.0                             |                                                  |
| Sex                                |                          |                           |                                                     |                                 |                                                  |
| Male                               | 2                        | 0.80 (0.27-2.37)          | 0.260                                               | 21.3                            | 0.783                                            |
| Postmenopausal women               | 2                        | 0.93 (0.59-1.48)          | 0.182                                               | 44.0                            |                                                  |
| Mixed                              | 1                        | 0.68 (0.24-1.93)          | -                                                   | -                               |                                                  |
| Geographic area                    |                          |                           |                                                     |                                 |                                                  |
| Asia                               | 1                        | 3.30 (0.20-54.45)         | -                                                   | -                               | 0.406                                            |

|                                           |   |                   |       |      |       |
|-------------------------------------------|---|-------------------|-------|------|-------|
| Non-Asia                                  | 3 | 0.82 (0.61-1.10)  | 0.337 | 11.1 |       |
| <b>HBsAg status</b>                       |   |                   |       |      |       |
| Mixed                                     | 3 | 0.75 (0.48-1.17)  | 0.572 | 0.0  | 0.734 |
| Unspecified                               | 1 | 0.87 (0.48-1.58)  | 0.093 | 64.6 |       |
| <b>Adjustment for HBsAg status</b>        |   |                   |       |      |       |
| Yes                                       | 3 | 0.75 (0.48-1.17)  | 0.572 | 0.0  | 0.734 |
| No                                        | 1 | 0.87 (0.48-1.58)  | 0.093 | 64.6 |       |
| <b>Adjustment for anti-HCV positivity</b> |   |                   |       |      |       |
| Yes                                       | 3 | 0.75 (0.48-1.17)  | 0.572 | 0.0  | 0.734 |
| No                                        | 1 | 0.87 (0.48-1.58)  | 0.093 | 64.6 |       |
| <b>Histology<sup>d</sup></b>              |   |                   |       |      |       |
| Total liver cancer                        | 2 | 0.83 (0.57-1.20)  | 0.198 | 38.2 | 0.935 |
| Hepatocellular carcinoma                  | 3 | 0.73 (0.36-1.45)  | 0.549 | 0.0  |       |
| Intrahepatic cholangiocarcinoma           | 1 | 0.90 (0.38-2.13)  | -     | -    |       |
| <b>Follow-up time (years)</b>             |   |                   |       |      |       |
| Mean/median<10                            | 3 | 0.87 (0.58-1.33)  | 0.270 | 23.5 | 0.703 |
| Mean/median≥10                            | 1 | 0.73 (0.44-1.21)  | -     | -    |       |
| <b>Estradiol</b>                          |   |                   |       |      |       |
| <b>Study design</b>                       |   |                   |       |      |       |
| Cohort study                              | 2 | 0.46 (0.16-1.31)  | 0.769 | 0.0  | 0.219 |
| Nested case-control study                 | 2 | 1.28 (0.83-1.98)  | 0.650 | 0.0  |       |
| <b>Sex<sup>c</sup></b>                    |   |                   |       |      |       |
| Male                                      | 3 | 0.95 (0.54-1.69)  | 0.362 | 1.6  | 0.778 |
| Female                                    | 2 | 1.30 (0.72-2.34)  | 0.387 | 0.0  |       |
| Postmenopausal women (only)               | 1 | 1.42 (0.76-2.65)  | -     | -    |       |
| Mixed                                     | 1 | 0.55 (0.11-2.75)  | -     | -    |       |
| <b>Geographic area</b>                    |   |                   |       |      |       |
| Asia                                      | 2 | 0.82 (0.31-2.18)  | 0.168 | 47.3 | 0.710 |
| Non-Asia                                  | 2 | 1.20 (0.58-2.45)  | 0.282 | 13.7 |       |
| <b>HBsAg status</b>                       |   |                   |       |      |       |
| Positive                                  | 1 | 1.16 (0.63-2.14)  | -     | -    | 0.872 |
| Mixed                                     | 2 | 0.88 (0.26-2.94)  | 0.102 | 62.5 |       |
| Unspecified                               | 1 | 0.55 (0.11-2.75)  | -     | -    |       |
| <b>Adjustment for HBsAg status</b>        |   |                   |       |      |       |
| Yes                                       | 2 | 0.88 (0.26-2.94)  | 0.102 | 62.5 | 0.997 |
| No                                        | 2 | 1.06 (0.60-1.87)  | 0.395 | 0.0  |       |
| <b>Adjustment for anti-HCV positivity</b> |   |                   |       |      |       |
| Yes                                       | 2 | 0.88 (0.26-2.94)  | 0.102 | 62.5 | 0.997 |
| No                                        | 2 | 1.06 (0.60-1.87)  | 0.395 | 0.0  |       |
| <b>Histology<sup>e</sup></b>              |   |                   |       |      |       |
| Total liver cancer                        | 2 | 1.20 (0.58-2.45)  | 0.282 | 13.7 | 0.577 |
| Hepatocellular carcinoma                  | 4 | 1.21 (0.61-2.40)  | 0.238 | 29.0 |       |
| Intrahepatic cholangiocarcinoma           | 2 | 2.11 (0.25-18.03) | 0.171 | 46.6 |       |
| <b>Follow-up time (years)</b>             |   |                   |       |      |       |

|                                     |   |                            |       |      |       |
|-------------------------------------|---|----------------------------|-------|------|-------|
| Mean/median<10                      | 3 | 0.85 (0.45-1.61)           | 0.311 | 14.3 | 0.452 |
| Mean/median≥10                      | 1 | 1.42 (0.76-2.65)           | -     | -    |       |
| <b>Testosterone/estradiol ratio</b> |   |                            |       |      |       |
| Study design                        |   |                            |       |      |       |
| Cohort study                        | 1 | <b>25.40 (3.10-208.11)</b> | -     | -    | 0.206 |
| Nested case-control study           | 2 | 0.96 (0.62-1.49)           | 0.427 | 0.0  |       |
| Sex                                 |   |                            |       |      |       |
| Male                                | 2 | 4.58 (0.23-92.64)          | 0.006 | 86.8 | 0.622 |
| Postmenopausal women                | 1 | 0.81 (0.44-1.49)           | -     | -    |       |
| Geographic area                     |   |                            |       |      |       |
| Asia                                | 2 | 4.58 (0.23-92.64)          | 0.006 | 86.8 | 0.622 |
| Non-Asia                            | 1 | 0.81 (0.44-1.49)           | -     | -    |       |
| HBsAg status                        |   |                            |       |      |       |
| Positive                            | 1 | 1.16 (0.61-2.21)           | -     | -    | 0.748 |
| Mixed                               | 2 | 3.89 (0.13-112.40)         | 0.002 | 89.5 |       |
| Adjustment for HBsAg status         |   |                            |       |      |       |
| Yes                                 | 2 | 3.89 (0.13-112.40)         | 0.002 | 89.5 | 0.748 |
| No                                  | 1 | 1.16 (0.61-2.21)           | -     | -    |       |
| Adjustment for anti-HCV positivity  |   |                            |       |      |       |
| Yes                                 | 2 | 3.89 (0.13-112.40)         | 0.002 | 89.5 | 0.748 |
| No                                  | 1 | 1.16 (0.61-2.21)           | -     | -    |       |
| Histology <sup>d</sup>              |   |                            |       |      |       |
| Total liver cancer                  | 1 | 0.81 (0.44-1.49)           | -     | -    | 0.539 |
| Hepatocellular carcinoma            | 3 | 2.64 (0.71-9.78)           | 0.022 | 73.9 |       |
| Intrahepatic cholangiocarcinoma     | 1 | 0.34 (0.10-1.16)           | -     | -    |       |
| Follow-up time (years)              |   |                            |       |      |       |
| Mean/median<10                      | 2 | 4.58 (0.23-92.64)          | 0.006 | 86.8 | 0.622 |
| Mean/median≥10                      | 1 | 0.81 (0.44-1.49)           | -     | -    |       |
| <b>Sex hormone-binding globulin</b> |   |                            |       |      |       |
| Study design                        |   |                            |       |      |       |
| Cohort study                        | 3 | <b>2.00 (1.14-3.51)</b>    | 0.033 | 65.6 | 0.874 |
| Nested case-control study           | 2 | <b>2.23 (1.02-4.87)</b>    | 0.176 | 45.5 |       |
| Sex                                 |   |                            |       |      |       |
| Male                                | 3 | 2.09 (0.78-5.64)           | 0.038 | 69.5 | 0.495 |
| Postmenopausal women                | 2 | <b>1.58 (1.09-2.29)</b>    | 0.793 | 0.0  |       |
| Mixed                               | 1 | <b>3.86 (1.32-11.29)</b>   | -     | -    |       |
| Geographic area                     |   |                            |       |      |       |
| Asia                                | 1 | 0.20 (0.02-2.00)           | -     | -    | 0.171 |
| Non-Asia                            | 4 | <b>2.15 (1.56-2.97)</b>    | 0.160 | 39.2 |       |
| HBsAg status                        |   |                            |       |      |       |
| Mixed                               | 4 | 2.21 (0.92-5.27)           | 0.035 | 65.2 | 0.733 |
| Unspecified                         | 1 | <b>1.95 (1.34-2.82)</b>    | 0.171 | 46.7 |       |
| Adjustment for HBsAg status         |   |                            |       |      |       |
| Yes                                 | 3 | 1.61 (0.55-4.76)           | 0.064 | 63.7 | 0.714 |

|                                    |   |                         |       |      |       |
|------------------------------------|---|-------------------------|-------|------|-------|
| No                                 | 2 | <b>2.21 (1.41-3.45)</b> | 0.096 | 57.3 |       |
| Adjustment for anti-HCV positivity |   |                         |       |      |       |
| Yes                                | 3 | 1.61 (0.55-4.76)        | 0.064 | 63.7 | 0.714 |
| No                                 | 2 | <b>2.21 (1.41-3.45)</b> | 0.096 | 57.3 |       |
| Histology <sup>d</sup>             |   |                         |       |      |       |
| Total liver cancer                 | 2 | <b>1.95 (1.52-2.49)</b> | 0.317 | 13.1 | 0.362 |
| Hepatocellular carcinoma           | 4 | <b>2.92 (1.19-7.14)</b> | 0.095 | 52.9 |       |
| Intrahepatic cholangiocarcinoma    | 1 | 1.23 (0.44-3.44)        | -     | -    |       |
| Follow-up time (years)             |   |                         |       |      |       |
| Mean/median<10                     | 4 | <b>2.20 (1.34-3.63)</b> | 0.042 | 59.6 | 0.700 |
| Mean/median≥10                     | 1 | 1.67 (0.95-2.94)        | -     | -    |       |

**Note:** Expressed as pooled OR and 95% CI comparing the highest with the lowest tertiles of sex hormone levels.

**Abbreviations:** anti-HCV, antibody to hepatitis C virus; CI, confidence interval; HBsAg, hepatitis B surface antigen; OR, odds ratio.

<sup>a</sup> *P* value in Cochran's *Q* test.

<sup>b</sup> *P* value in the test of subgroup difference.

<sup>c</sup> The data for male, female, mixed of Ahmed 2023 were included simultaneously in the sex subgroup analysis of estradiol.

<sup>d</sup> The data for liver cancer, hepatocellular carcinoma, and intrahepatic cholangiocarcinoma of Petrick 2020 were included simultaneously in the subgroup analysis of histology.

<sup>e</sup> The data for liver cancer, hepatocellular carcinoma, and intrahepatic cholangiocarcinoma of Petrick 2020 and Ahmed 2023 were included simultaneously in the histology subgroup analysis of estradiol.



**Supplementary Table S7. Subgroup analysis of prediagnostic circulating sex hormones levels and risk of pancreatic cancer**

| <b>Study characteristics</b>        | <b>Number of studies</b> | <b>Pooled OR (95% CI)</b> | <b><math>P_{\text{Heterogeneity}}^a</math></b> | <b><math>I^2</math> (%)</b> | <b><math>P_{\text{Difference}}^b</math></b> |
|-------------------------------------|--------------------------|---------------------------|------------------------------------------------|-----------------------------|---------------------------------------------|
| <b>Testosterone</b>                 |                          |                           |                                                |                             |                                             |
| Sex <sup>c</sup>                    |                          |                           |                                                |                             |                                             |
| Male                                | 2                        | 1.11 (0.77-1.60)          | 0.742                                          | 0.0                         | 0.503                                       |
| Female                              | 2                        | 0.75 (0.50-1.14)          | 0.756                                          | 0.0                         |                                             |
| Mixed                               | 1                        | 0.99 (0.72-1.36)          | -                                              | -                           |                                             |
| Follow-up time (years)              |                          |                           |                                                |                             |                                             |
| Mean/median<10                      | 1                        | 0.99 (0.72-1.36)          | -                                              | -                           | 0.648                                       |
| Mean/median≥10                      | 1                        | 0.82 (0.50-1.35)          | 0.460                                          | 0.0                         |                                             |
| <b>Free testosterone</b>            |                          |                           |                                                |                             |                                             |
| Sex <sup>c</sup>                    |                          |                           |                                                |                             |                                             |
| Male                                | 1                        | 1.15 (0.74-1.79)          | -                                              | -                           | 0.619                                       |
| Female                              | 1                        | 0.58 (0.33-1.02)          | -                                              | -                           |                                             |
| Mixed                               | 1                        | 0.89 (0.63-1.26)          | -                                              | -                           |                                             |
| <b>Estradiol</b>                    |                          |                           |                                                |                             |                                             |
| Sex <sup>d</sup>                    |                          |                           |                                                |                             |                                             |
| Male                                | 1                        | 2.82 (0.20-39.76)         | -                                              | -                           | 0.912                                       |
| Female                              | 1                        | 0.32 (0.08-1.28)          | -                                              | -                           |                                             |
| Mixed                               | 1                        | 0.43 (0.13-1.42)          | -                                              | -                           |                                             |
| <b>Free estradiol</b>               |                          |                           |                                                |                             |                                             |
| Sex <sup>d</sup>                    |                          |                           |                                                |                             |                                             |
| Male                                | 1                        | 0.67 (0.38-1.18)          | -                                              | -                           | -                                           |
| Female                              | 1                        | 0.68 (0.46-1.01)          | -                                              | -                           |                                             |
| <b>Sex hormone-binding globulin</b> |                          |                           |                                                |                             |                                             |
| Sex <sup>c</sup>                    |                          |                           |                                                |                             |                                             |
| Male                                | 1                        | 1.16 (0.72-1.87)          | -                                              | -                           | 0.953                                       |
| Female                              | 1                        | 1.22 (0.70-2.13)          | -                                              | -                           |                                             |
| Mixed                               | 1                        | 1.18 (0.82-1.70)          | -                                              | -                           |                                             |

**Note:** Expressed as pooled OR and 95% CI comparing the highest with the lowest tertiles of sex hormone levels.

**Abbreviations:** OR, odds ratio; CI, confidence interval.

<sup>a</sup>  $P$  value in Cochran's  $Q$  test.

<sup>b</sup>  $P$  value in the test of subgroup difference.

<sup>c</sup> The data for male, female, and mixed of Peila 2020 were included simultaneously in the subgroup analysis of sex.

<sup>d</sup> The data for male, female, and mixed of Ahmed 2023 were included simultaneously in the subgroup analysis of sex.

**Supplementary Table S8. Subgroup analysis of prediagnostic circulating sex hormones levels and risk of colorectal cancer**

| Study characteristics         | Number of studies | Pooled OR (95% CI)      | $P_{\text{Heterogeneity}}^a$ | $I^2$ (%) | $P_{\text{Difference}}^b$ |
|-------------------------------|-------------------|-------------------------|------------------------------|-----------|---------------------------|
| <b>Testosterone</b>           |                   |                         |                              |           |                           |
| Study design                  |                   |                         |                              |           |                           |
| Cohort study                  | 5                 | 0.94 (0.86-1.02)        | 0.907                        | 0.0       | 0.813                     |
| Nested case-control study     | 4                 | 1.04 (0.75-1.46)        | 0.006                        | 72.0      |                           |
| Sex                           |                   |                         |                              |           |                           |
| Male                          | 6                 | <b>0.88 (0.80-0.97)</b> | 0.530                        | 0.0       | 0.057                     |
| Female                        | 5                 | 1.12 (0.90-1.40)        | 0.116                        | 45.9      |                           |
| Postmenopausal women (only)   | 3                 | 1.35 (0.98-1.86)        | 0.214                        | 35.0      |                           |
| Geographic area               |                   |                         |                              |           |                           |
| Asia                          | 1                 | <b>2.10 (1.11-3.97)</b> | -                            | -         | <b>0.041</b>              |
| Non-Asia                      | 8                 | 0.93 (0.86-1.01)        | 0.370                        | 7.8       |                           |
| Follow-up time (years)        |                   |                         |                              |           |                           |
| Mean/median<10                | 3                 | 0.93 (0.85-1.02)        | 0.661                        | 0.0       | 0.722                     |
| Mean/median≥10                | 6                 | 1.01 (0.81-1.26)        | 0.038                        | 53.0      |                           |
| <b>Free testosterone</b>      |                   |                         |                              |           |                           |
| Study design                  |                   |                         |                              |           |                           |
| Cohort study                  | 3                 | 0.99 (0.90-1.08)        | 0.999                        | 0.0       | 0.647                     |
| Nested case-control study     | 3                 | 1.11 (0.76-1.62)        | 0.054                        | 65.7      |                           |
| Sex                           |                   |                         |                              |           |                           |
| Male                          | 3                 | 0.97 (0.87-1.07)        | 0.474                        | 0.0       | 0.288                     |
| Female                        | 3                 | 1.13 (0.89-1.42)        | 0.161                        | 45.3      |                           |
| Postmenopausal women (only)   | 2                 | 1.29 (0.99-1.70)        | 0.368                        | 0.0       |                           |
| Geographic area               |                   |                         |                              |           |                           |
| Asia                          | 1                 | 1.63 (0.92-2.89)        | -                            | -         | 0.166                     |
| Non-Asia                      | 5                 | 0.99 (0.91-1.08)        | 0.504                        | 0.0       |                           |
| Follow-up time (years)        |                   |                         |                              |           |                           |
| Mean/median<10                | 3                 | 0.99 (0.90-1.08)        | 0.999                        | 0.0       | 0.647                     |
| Mean/median≥10                | 3                 | 1.11 (0.76-1.62)        | 0.054                        | 65.7      |                           |
| <b>Dehydroepiandrosterone</b> |                   |                         |                              |           |                           |
| Sex*                          |                   |                         |                              |           |                           |
| Male                          | 2                 | 1.11 (0.83-1.49)        | 0.817                        | 0.0       | 0.582                     |
| Female                        | 2                 | 0.87 (0.65-1.18)        | 0.941                        | 0.0       |                           |
| Postmenopausal women (only)   | 1                 | 0.87 (0.63-1.20)        | -                            | -         |                           |
| Mixed                         | 1                 | 0.84 (0.43-1.64)        | -                            | -         |                           |
| Follow-up time (years)        |                   |                         |                              |           |                           |
| Mean/median<10                | 1                 | 0.84 (0.43-1.64)        | -                            | -         | 0.739                     |
| Mean/median≥10                | 2                 | 0.98 (0.78-1.24)        | 0.301                        | 6.4       |                           |
| <b>Estrone</b>                |                   |                         |                              |           |                           |
| Study design                  |                   |                         |                              |           |                           |
| Nested case-control study     | 5                 | 1.03 (0.76-1.39)        | 0.004                        | 71.1      | 0.837                     |

|                                     |    |                  |       |      |       |
|-------------------------------------|----|------------------|-------|------|-------|
| Case-cohort study                   | 1  | 1.13 (0.73-1.75) | -     | -    |       |
| <b>Sex</b>                          |    |                  |       |      |       |
| Male                                | 2  | 1.06 (0.84-1.34) | 0.815 | 0.0  | 0.945 |
| Postmenopausal women                | 5  | 1.04 (0.69-1.57) | 0.002 | 76.9 |       |
| <b>Estradiol</b>                    |    |                  |       |      |       |
| <b>Study design</b>                 |    |                  |       |      |       |
| Cohort study                        | 4  | 1.01 (0.86-1.19) | 0.402 | 0.0  | 0.454 |
| Nested case-control study           | 6  | 0.95 (0.77-1.17) | 0.157 | 35.5 |       |
| Case-cohort study                   | 2  | 1.28 (0.74-2.22) | 0.103 | 62.3 |       |
| <b>Sex</b>                          |    |                  |       |      |       |
| Male                                | 5  | 0.99 (0.85-1.14) | 0.477 | 0.0  | 0.969 |
| Female                              | 8  | 1.04 (0.82-1.31) | 0.055 | 49.2 |       |
| Postmenopausal women (only)         | 7  | 1.04 (0.78-1.38) | 0.035 | 55.6 |       |
| <b>Geographic area</b>              |    |                  |       |      |       |
| Asia                                | 1  | 2.28 (0.77-6.75) | -     | -    | 0.180 |
| Non-Asia                            | 11 | 1.00 (0.88-1.15) | 0.181 | 26.9 |       |
| <b>Follow-up time (years)</b>       |    |                  |       |      |       |
| Mean/median<10                      | 4  | 1.12 (0.87-1.45) | 0.099 | 52.2 | 0.392 |
| Mean/median≥10                      | 8  | 0.97 (0.81-1.15) | 0.244 | 22.5 |       |
| <b>Free estradiol</b>               |    |                  |       |      |       |
| <b>Study design</b>                 |    |                  |       |      |       |
| Cohort study                        | 1  | 1.02 (0.77-1.36) | 0.567 | 0.0  | 0.471 |
| Nested case-control study           | 3  | 0.78 (0.51-1.20) | 0.010 | 78.1 |       |
| <b>Sex</b>                          |    |                  |       |      |       |
| Male                                | 2  | 0.93 (0.73-1.18) | 0.933 | 0.0  | 0.682 |
| Female                              | 3  | 0.83 (0.50-1.37) | 0.005 | 81.2 |       |
| Postmenopausal women (only)         | 2  | 0.71 (0.33-1.52) | 0.004 | 87.8 |       |
| <b>Follow-up time (years)</b>       |    |                  |       |      |       |
| Mean/median<10                      | 1  | 1.02 (0.77-1.36) | 0.567 | 0.0  | 0.471 |
| Mean/median≥10                      | 3  | 0.78 (0.51-1.20) | 0.010 | 78.1 |       |
| <b>Estradiol/testosterone ratio</b> |    |                  |       |      |       |
| <b>Study design</b>                 |    |                  |       |      |       |
| Cohort study                        | 1  | 1.19 (0.90-1.58) | 0.643 | 0.0  | 0.866 |
| Nested case-control study           | 2  | 1.07 (0.49-2.35) | 0.000 | 89.2 |       |
| <b>Sex</b>                          |    |                  |       |      |       |
| Male                                | 2  | 1.59 (0.79-3.22) | 0.016 | 82.7 | 0.484 |
| Female                              | 3  | 0.91 (0.55-1.48) | 0.021 | 74.2 |       |
| Postmenopausal women (only)         | 2  | 0.74 (0.34-1.60) | 0.021 | 81.3 |       |
| <b>Follow-up time (years)</b>       |    |                  |       |      |       |
| Mean/median<10                      | 1  | 1.19 (0.90-1.58) | 0.643 | 0.0  | 0.866 |
| Mean/median≥10                      | 2  | 1.07 (0.49-2.35) | 0.000 | 89.2 |       |
| <b>Progesterone</b>                 |    |                  |       |      |       |
| <b>Study design</b>                 |    |                  |       |      |       |
| Nested case-control study           | 4  | 0.96 (0.81-1.14) | 0.940 | 0.0  | 0.431 |

|                                     |   |                         |       |      |       |
|-------------------------------------|---|-------------------------|-------|------|-------|
| Case-cohort study                   | 1 | 1.19 (0.77-1.84)        | -     | -    |       |
| <b>Sex</b>                          |   |                         |       |      |       |
| Male                                | 1 | 0.90 (0.68-1.19)        | -     | -    | 0.490 |
| Postmenopausal women                | 4 | 1.03 (0.85-1.25)        | 0.895 | 0.0  |       |
| <b>Geographic area</b>              |   |                         |       |      |       |
| Asia                                | 1 | 0.94 (0.43-2.05)        | -     | -    | 0.909 |
| Non-Asia                            | 4 | 0.99 (0.84-1.16)        | 0.752 | 0.0  |       |
| <b>Sex hormone-binding globulin</b> |   |                         |       |      |       |
| <b>Study design</b>                 |   |                         |       |      |       |
| Cohort study                        | 4 | 0.99 (0.86-1.15)        | 0.140 | 45.2 | 0.928 |
| Nested case-control study           | 6 | 1.02 (0.75-1.39)        | 0.002 | 70.9 |       |
| <b>Sex</b>                          |   |                         |       |      |       |
| Male                                | 5 | <b>0.89 (0.80-0.98)</b> | 0.591 | 0.0  | 0.295 |
| Female                              | 6 | 1.16 (0.91-1.49)        | 0.020 | 62.6 |       |
| Postmenopausal women (only)         | 5 | 1.17 (0.81-1.69)        | 0.011 | 69.2 |       |
| <b>Geographic area</b>              |   |                         |       |      |       |
| Asia                                | 1 | 0.94 (0.56-1.58)        | -     | -    | 0.826 |
| Non-Asia                            | 9 | 1.02 (0.86-1.21)        | 0.002 | 65.9 |       |
| <b>Follow-up time (years)</b>       |   |                         |       |      |       |
| Mean/median<10                      | 3 | 0.98 (0.83-1.16)        | 0.084 | 59.6 | 0.753 |
| Mean/median≥10                      | 7 | 1.04 (0.79-1.38)        | 0.004 | 66.5 |       |

**Note:** Expressed as pooled OR and 95% CI comparing the highest with the lowest tertiles of sex hormone levels.

**Abbreviations:** OR, odds ratio; CI, confidence interval.

<sup>a</sup> *P* value in Cochran's *Q* test.

<sup>b</sup> *P* value in the test of subgroup difference.

\*The data for male, female, and mixed of Alberg 2000 were included simultaneously in the sex subgroup analysis of dehydroepiandrosterone.

**Supplementary Table S9. Subgroup analysis of prediagnostic circulating sex hormones levels and risk of colon cancer**

| <b>Study characteristics</b>  | <b>Number of studies</b> | <b>Pooled OR (95% CI)</b> | <b><i>P</i><sub>Heterogeneity</sub><sup>a</sup></b> | <b><i>I</i><sup>2</sup> (%)</b> | <b><i>P</i><sub>Difference</sub><sup>b</sup></b> |
|-------------------------------|--------------------------|---------------------------|-----------------------------------------------------|---------------------------------|--------------------------------------------------|
| <b>Testosterone</b>           |                          |                           |                                                     |                                 |                                                  |
| Study design                  |                          |                           |                                                     |                                 |                                                  |
| Cohort study                  | 3                        | 0.93 (0.83-1.05)          | 0.350                                               | 8.6                             | 0.947                                            |
| Nested case-control study     | 2                        | 0.93 (0.65-1.33)          | 0.099                                               | 63.2                            |                                                  |
| Sex                           |                          |                           |                                                     |                                 |                                                  |
| Male                          | 3                        | <b>0.86 (0.75-0.97)</b>   | 0.481                                               | 0.0                             | 0.281                                            |
| Female                        | 3                        | 1.03 (0.90-1.19)          | 0.646                                               | 0.0                             |                                                  |
| Postmenopausal women (only)   | 1                        | 1.12 (0.82-1.53)          | -                                                   | -                               |                                                  |
| Follow-up time (years)        |                          |                           |                                                     |                                 |                                                  |
| Mean/median<10                | 2                        | 0.93 (0.77-1.13)          | 0.098                                               | 63.5                            | 0.949                                            |
| Mean/median≥10                | 3                        | 0.94 (0.78-1.13)          | 0.356                                               | 7.5                             |                                                  |
| <b>Free testosterone</b>      |                          |                           |                                                     |                                 |                                                  |
| Study design                  |                          |                           |                                                     |                                 |                                                  |
| Cohort study                  | 2                        | 1.00 (0.89-1.13)          | 0.474                                               | 0.0                             | 0.955                                            |
| Nested case-control study     | 2                        | 0.99 (0.66-1.48)          | 0.068                                               | 69.9                            |                                                  |
| Sex                           |                          |                           |                                                     |                                 |                                                  |
| Male                          | 2                        | 0.92 (0.79-1.07)          | 0.326                                               | 0.0                             | 0.797                                            |
| Female                        | 2                        | 1.09 (0.93-1.27)          | 0.433                                               | 0.0                             |                                                  |
| Postmenopausal women (only)   | 1                        | 1.21 (0.89-1.65)          | -                                                   | -                               |                                                  |
| Follow-up time (years)        |                          |                           |                                                     |                                 |                                                  |
| Mean/median<10                | 2                        | 1.00 (0.89-1.13)          | 0.474                                               | 0.0                             | 0.955                                            |
| Mean/median≥10                | 2                        | 0.99 (0.66-1.48)          | 0.068                                               | 69.9                            |                                                  |
| <b>Dehydroepiandrosterone</b> |                          |                           |                                                     |                                 |                                                  |
| Sex*                          |                          |                           |                                                     |                                 |                                                  |
| Male                          | 2                        | 1.11 (0.83-1.49)          | 0.817                                               | 0.0                             | 0.530                                            |
| Female                        | 2                        | 0.87 (0.65-1.18)          | 0.941                                               | 0.0                             |                                                  |
| Postmenopausal women (only)   | 1                        | 0.87 (0.63-1.20)          | -                                                   | -                               |                                                  |
| Mixed                         | 1                        | 0.84 (0.43-1.64)          | -                                                   | -                               |                                                  |
| Follow-up time (years)        |                          |                           |                                                     |                                 |                                                  |
| Mean/median<10                | 1                        | 0.84 (0.43-1.64)          | -                                                   | -                               | 0.739                                            |
| Mean/median≥10                | 2                        | 0.98 (0.78-1.24)          | 0.301                                               | 6.4                             |                                                  |
| <b>Estrone</b>                |                          |                           |                                                     |                                 |                                                  |
| Sex                           |                          |                           |                                                     |                                 |                                                  |
| Male                          | 1                        | 1.09 (0.80-1.49)          | -                                                   | -                               | 0.880                                            |
| Postmenopausal women          | 3                        | 0.94 (0.40-2.23)          | 0.000                                               | 90.6                            |                                                  |
| <b>Estradiol</b>              |                          |                           |                                                     |                                 |                                                  |
| Study design                  |                          |                           |                                                     |                                 |                                                  |
| Cohort study                  | 2                        | 0.98 (0.75-1.29)          | 0.278                                               | 14.9                            | 0.482                                            |
| Nested case-control study     | 3                        | 0.77 (0.48-1.23)          | 0.007                                               | 79.6                            |                                                  |
| Sex                           |                          |                           |                                                     |                                 |                                                  |

|                                     |   |                  |       |      |       |
|-------------------------------------|---|------------------|-------|------|-------|
| Male                                | 2 | 0.90 (0.73-1.11) | 1.000 | 0.0  | 0.665 |
| Female                              | 3 | 0.83 (0.46-1.52) | 0.002 | 83.3 |       |
| Postmenopausal women (only)         | 2 | 0.69 (0.29-1.66) | 0.002 | 89.1 |       |
| Follow-up time (years)              |   |                  |       |      |       |
| Mean/median<10                      | 2 | 0.98 (0.75-1.29) | 0.278 | 14.9 | 0.482 |
| Mean/median≥10                      | 3 | 0.77 (0.48-1.23) | 0.007 | 79.6 |       |
| <b>Free estradiol</b>               |   |                  |       |      |       |
| Study design                        |   |                  |       |      |       |
| Cohort study                        | 1 | 1.04 (0.65-1.67) | 0.154 | 50.9 | 0.482 |
| Nested case-control study           | 3 | 0.69 (0.37-1.29) | 0.000 | 88.8 |       |
| Sex                                 |   |                  |       |      |       |
| Male                                | 2 | 0.89 (0.69-1.14) | 0.680 | 0.0  | 0.609 |
| Female                              | 3 | 0.77 (0.35-1.71) | 0.000 | 90.6 |       |
| Postmenopausal women (only)         | 2 | 0.59 (0.19-1.82) | 0.000 | 93.7 |       |
| Follow-up time (years)              |   |                  |       |      |       |
| Mean/median<10                      | 1 | 1.04 (0.65-1.67) | 0.154 | 50.9 | 0.482 |
| Mean/median≥10                      | 3 | 0.69 (0.37-1.29) | 0.000 | 88.8 |       |
| <b>Estradiol/testosterone ratio</b> |   |                  |       |      |       |
| Study design                        |   |                  |       |      |       |
| Cohort study                        | 1 | 1.18 (0.74-1.88) | 0.150 | 51.7 | 0.830 |
| Nested case-control study           | 1 | 1.06 (0.75-1.50) | -     | -    |       |
| Sex                                 |   |                  |       |      |       |
| Male                                | 1 | 0.94 (0.61-1.45) | -     | -    | 0.862 |
| Female                              | 2 | 1.21 (0.86-1.71) | 0.240 | 27.7 |       |
| Postmenopausal women (only)         | 1 | 1.06 (0.75-1.50) | -     | -    |       |
| Follow-up time (years)              |   |                  |       |      |       |
| Mean/median<10                      | 1 | 1.18 (0.74-1.88) | 0.150 | 51.7 | 0.830 |
| Mean/median≥10                      | 1 | 1.06 (0.75-1.50) | -     | -    |       |
| <b>Sex hormone-binding globulin</b> |   |                  |       |      |       |
| Study design                        |   |                  |       |      |       |
| Cohort study                        | 2 | 1.00 (0.80-1.24) | 0.116 | 59.6 | 0.691 |
| Nested case-control study           | 3 | 1.17 (0.72-1.93) | 0.010 | 78.3 |       |
| Sex                                 |   |                  |       |      |       |
| Male                                | 2 | 0.89 (0.76-1.04) | 0.721 | 0.0  | 0.551 |
| Female                              | 3 | 1.26 (0.89-1.79) | 0.032 | 70.9 |       |
| Postmenopausal women (only)         | 2 | 1.41 (0.68-2.92) | 0.010 | 84.8 |       |
| Follow-up time (years)              |   |                  |       |      |       |
| Mean/median<10                      | 2 | 1.00 (0.80-1.24) | 0.116 | 59.6 | 0.691 |
| Mean/median≥10                      | 3 | 1.17 (0.72-1.93) | 0.010 | 78.3 |       |

**Note:** Expressed as pooled OR and 95% CI comparing the highest with the lowest tertiles of sex hormone levels.

**Abbreviations:** OR, odds ratio; CI, confidence interval.

<sup>a</sup> *P* value in Cochran's *Q* test; <sup>b</sup> *P* value in the test of subgroup difference.

\* The data for male, female, and mixed of Alberg 2000 were included simultaneously in the sex subgroup analysis of dehydroepiandrosterone.

**Supplementary Table S10. Subgroup analysis of prediagnostic circulating sex hormones levels and risk of rectal cancer**

| Study characteristics               | Number of studies | Pooled OR (95% CI)      | $P_{\text{Heterogeneity}}^a$ | $I^2$ (%) | $P_{\text{Difference}}^b$ |
|-------------------------------------|-------------------|-------------------------|------------------------------|-----------|---------------------------|
| <b>Estradiol</b>                    |                   |                         |                              |           |                           |
| Study design                        |                   |                         |                              |           |                           |
| Cohort study                        | 1                 | 0.86 (0.61-1.20)        | 0.848                        | 0.0       | 0.461                     |
| Nested case-control study           | 1                 | 1.44 (0.63-3.29)        | -                            | -         |                           |
| Sex                                 |                   |                         |                              |           |                           |
| Male                                | 1                 | 0.87 (0.61-1.24)        | -                            | -         | 0.603                     |
| Postmenopausal women                | 2                 | 1.14 (0.60-2.19)        | 0.372                        | 0.0       |                           |
| Follow-up time (years)              |                   |                         |                              |           |                           |
| Mean/median<10                      | 1                 | 0.86 (0.61-1.20)        | 0.848                        | 0.0       | 0.461                     |
| Mean/median≥10                      | 1                 | 1.44 (0.63-3.29)        | -                            | -         |                           |
| <b>Sex hormone-binding globulin</b> |                   |                         |                              |           |                           |
| Study design                        |                   |                         |                              |           |                           |
| Cohort study                        | 2                 | 0.95 (0.80-1.13)        | 0.721                        | 0.0       | 0.229                     |
| Nested case-control study           | 1                 | <b>3.02 (1.31-6.96)</b> | -                            | -         |                           |
| Sex                                 |                   |                         |                              |           |                           |
| Male                                | 1                 | 0.93 (0.76-1.14)        | -                            | -         | 0.361                     |
| Female                              | 2                 | 1.62 (0.55-4.75)        | 0.016                        | 82.6      |                           |
| Postmenopausal women (only)         | 1                 | <b>3.02 (1.31-6.96)</b> | -                            | -         |                           |
| Follow-up time (years)              |                   |                         |                              |           |                           |
| Mean/median<10                      | 2                 | 0.95 (0.80-1.13)        | 0.721                        | 0.0       | 0.229                     |
| Mean/median≥10                      | 1                 | <b>3.02 (1.31-6.96)</b> | -                            | -         |                           |

**Note:** Expressed as pooled OR and 95% CI comparing the highest with the lowest tertiles of sex hormone levels.

**Abbreviations:** OR, odds ratio; CI, confidence interval.

<sup>a</sup>  $P$  value in Cochran's  $Q$  test.

<sup>b</sup>  $P$  value in the test of subgroup difference.
